1 Reassortment, positive selection, and the inter-segmental patterns of divergence  
2 and polymorphism in influenza virus H3N2

3

4 Kangchon Kim, Yeongseon Park and Yuseob Kim

5 Division of EcoScience and Department of Life Science,

6 Ewha Womans University, Seoul, Korea 03760

7

8

9 Running title: Reassortment and selection in flu virus

10 Key words: influenza virus, polymorphism, reassortment, selective sweep, molecular evolution

11

12 Corresponding author:

13 Yuseob Kim

14 Department of Life Science, Ewha Womans University, Ewhayeodae-gil 52, Seodaemun-gu, Seoul,

15 Korea 03760.

16 Email: [yuseob@ewha.ac.kr](mailto:yuseob@ewha.ac.kr)

17 Phone: +82 2 3277 3435

18

19

## ABSTRACT

20

21 Reassortment in viruses with segmented genome is a major evolutionary process for their genetic  
22 diversity and adaptation. It is also crucial in generating different levels of sequence polymorphism  
23 among segments when positive selection occurs at different rates on them. Previous studies have  
24 detected intra-subtype reassortment events in human influenza H3N2 by between-segment incongruity  
25 in phylogenetic tree topology. Here, we quantitatively estimate the reassortment rate, probability that a  
26 pair of segments in a viral lineage become separated in a unit time, between hemmagglutinin (HA) and  
27 four non-antigenic segments (PB2, PB1, PA and NP) in human influenza virus H3N2. Using statistics  
28 that measure incongruity in tree topology or linkage disequilibrium between segments and performing  
29 simulations that are constrained to reproduce the various patterns of H3N2 molecular evolution, we  
30 infer that reassortment rate ranges between 0.001 and 0.01 assuming one generation to be 1/80 year.  
31 However, we find that a higher rate of reassortment is required to generate the observed pattern of ~40%  
32 less synonymous sequence polymorphism on HA relative to other non-HA segments, which results from  
33 recurrent selective sweeps by antigenic variants on the HA segment. Here, synonymous diversity was  
34 compared after correcting for difference in inferred mutation rates among segments, which we found  
35 significant. We also explored analytic approximations for inter-segmental difference in sequence  
36 diversity for a given reassortment rate to understand the underlying dynamics of recurrent positive  
37 selection. It is suggested that the effects of clonal interference and potentially demography-dependent  
38 rate of reassortment in the process of recurrent selective sweeps must be considered to fully explain the  
39 genomic pattern of diversity in H3N2 viruses.

40

41 The evolution of influenza virus has been one of major long-standing subjects of modern biological  
42 researches, owing to its significant impact not only on human public health but also on the study of  
43 adaptive molecular evolution (FITCH *et al.* 1991; YANG 2000; NELSON AND HOLMES 2007). Studies  
44 focused on the sequence evolution of hemagglutinin (HA) and neuraminidase (NA) gene segments  
45 because HA and NA proteins are recognized as antigens by host adaptive immune system. Rapid amino  
46 acid substitutions at their epitope sites cause “antigenic drift” that forces updates in flu vaccines. The  
47 occurrence of positive selection on these sites was confirmed by various evidences and is now generally  
48 believed to drive the evolutionary dynamics of influenza viruses. However, given that the complex  
49 seasonal dynamics of viral populations has its own effect on the temporal patterns of sequence diversity  
50 or polymorphism and that multiple antigenic sites, together with other functional sites on a non-  
51 recombining segment (“complete linkage” within a segment), undergo correlated evolutionary changes,  
52 it is not easy to identify and analyze selection from the observation of viral sequence evolution  
53 (ILLINGWORTH AND MUSTONEN 2012; STRELKOWA AND LASSIG 2012; KIM AND KIM 2015).

54 The correct evolutionary model of influenza virus must predict the observed patterns of sequence  
55 diversity as accurately as possible. The observed patterns include the characteristic “cactus-like”  
56 genealogical trees for individual viral segments (BUONAGURIO *et al.* 1986; FERGUSON *et al.* 2003;  
57 BEDFORD *et al.* 2011), the ratio of nonsynonymous versus synonymous sequence changes at epitope  
58 and non-epitope sites (INA AND GOJOBORI 1994), the relative distribution of amino acid substitutions in  
59 external versus internal branches of trees (FITCH *et al.* 1997; PYBUS *et al.* 2007), the absolute level and  
60 geographic differentiation of sequence diversity (BEDFORD *et al.* 2010), and the temporal correlation of  
61 variants’ fixation events (STRELKOWA AND LASSIG 2012; KIM AND KIM 2015). These patterns were  
62 mostly observed in the HA segment and therefore models were developed mainly to explain the  
63 evolution of HA gene. However, the evolutionary change of HA is not independent of other segments.  
64 Unless viruses co-infect hosts very frequently and exchange segments with each other, thus resulting in  
65 very frequent reassortment, different segments in a viral lineage are not separated during most of the

66 infectious cycles. Such correlated inheritance, or genetic linkage across segments, means that  
67 evolutionary events on one segment can affect the dynamics of others. The pattern of genetic variation  
68 observed in HA is therefore expected to be shaped by the fitness effects of variants not only on HA but  
69 also on other segments.

70 The HA segment of H3N2 viruses exhibit lower level of genetic diversity, measured in mean time to  
71 coalescence, than other segments (RAMBAUT *et al.* 2008). This is explained by recurrent positive  
72 selection occurring at far higher rate on the HA segment than other segments. Selective sweeps driven  
73 by antigenic variants on HA therefore cause the greatest reduction in polymorphism at linked sites on  
74 the same segment but less severe reduction at other segments due to occasional events of reassortment  
75 that break down the hitchhiking effect (MAYNARD SMITH AND HAIGH 1974). Relative diversity between  
76 segments is therefore informative for adaptive evolution in the HA gene. In addition, negative (or  
77 purifying) selection against deleterious mutations cause reduction in polymorphism, an effect termed  
78 background selection (CHARLESWORTH *et al.* 1993). This variation-reducing effect is also greatest on  
79 completely linked sites and diminishes as linkage becomes weaker. Since negative selection must be  
80 operating in all genes of influenza virus to maintain their functions, genetic diversity at HA must be  
81 affected not only by negative selection on the same segment but also that on all the other segments,  
82 unless reassortment is very frequent relative to the strength of negative selection.

83 Therefore, the evolutionary model of positive and negative selection should be tested against the inter-  
84 segmental levels and patterns of sequence polymorphism. However, a crucial parameter in such a model  
85 with multiple viral segment, the rate of reassortment between segments, is not well known.  
86 Reassortment in segmented RNA virus, effectively equivalent to meiotic recombination in most  
87 eukaryotes, plays a critical role in their evolution. To date, eleven families of RNA virus are known to  
88 have segmented genome (MCDONALD *et al.* 2016). Among these, reassortment in influenza virus has  
89 been most intensively studied. Through this process, influenza viruses can acquire novel variation that  
90 confers resistance to antivirals (SIMONSEN *et al.* 2007). Intrasubtype reassortments also drive adaptive

91 amino acid replacements. Past pandemics have been attributed to the result of reassortment between  
92 different influenza subtypes (NELSON AND HOLMES 2007). Therefore, detecting and understanding  
93 reassortment has been of great public health interest.

94 Numerous studies have detected reassortment from serially sampled influenza virus sequences.  
95 Reassortments were observed within and between subtypes of human influenza A (HOLMES *et al.* 2005;  
96 SCHWEIGER *et al.* 2006; LYCETT *et al.* 2012; LU *et al.* 2014; WESTGEEST *et al.* 2014; PINSENT *et al.*  
97 2015; BERRY *et al.* 2016; VILLA AND LÄSSIG 2017), and between lineages of influenza B virus (DUDAS  
98 *et al.* 2014). While it can be identified manually by comparing phylogeny between segments, for  
99 comprehensive analysis and identification computational detection algorithms were suggested. Most  
100 widely used method detects a clade that occupies a position in a phylogenetic tree constructed for one  
101 segment is located on a different position in the corresponding tree for a different segment (NAGARAJAN  
102 AND KINGSFORD 2010). Such a clade thus represents a reassortant. Other methods are not dependent on  
103 phylogeny. RABADAN *et al.* (2008) identified the presence of reassortment when mean sequence  
104 difference between two taxa is highly variable for different segments. However, this approach  
105 overlooked the possibility that different segments may have different sequence diversity not due to  
106 reassortment but due to segment-dependent effective population sizes.

107 Despite these sophisticated methods for identifying reassortment, rare attempt has been made to  
108 estimate how frequently it occurs during viral reproduction, particularly in comparison to the rates of  
109 mutation and coalescence. The rate of reassortment per unit time ( $\Delta t$ ) can be defined as a probability  
110 that a pair of segments in a given individual virus at time  $t$  come from different parental viruses that  
111 existed at time  $t - \Delta t$ . If the reproduction of viruses can be approximated in a discrete-time process, a  
112 natural choice for the unit time above can be the average length of a single host infection cycle, which  
113 we arbitrarily define to be one “generation” (KIM AND KIM 2016). In previous studies, reassortment rate  
114 was often estimated as the number of detected events divided by years or the number of synonymous  
115 changes on the tree (VILLA AND LÄSSIG 2017). This quantity may be a lower bound of the actual rate

116 since only those events leaving sufficiently conspicuous inter-segmental incongruence in phylogenies  
117 are counted. In this study, we perform a quantitative analysis of reassortment rate in influenza H3N2,  
118 using summary statistics (“metrics”) that measure either incongruity in tree topology or linkage  
119 disequilibrium. We conduct simulations of viral sequence evolution under four different models,  
120 including recurrent positive selection with and without complex demography, that are however  
121 constrained to replicate the key patterns of H3N2 sequence variation. Then, the range of reassortment  
122 rate that reproduces the observed values of these metrics as well as the ratio of sequence diversity at  
123 HA versus non-HA segments will be identified. We also seek analytic approximations for the effect of  
124 recurrent positive selection with varying reassortment rate and other theoretical explanations to  
125 understand inter-segmental variation in the level of polymorphism observed in the actual and simulated  
126 sequences.

127

## 128 MATERIALS and METHODS

129

### 130 **Sequence data**

131 Genome sets of human influenza A/H3N2 sequences were downloaded from Influenza Virus Genome  
132 Set of National Center for Biotechnology Information (NCBI). A genome set is defined as the sequences  
133 of viral segments from a single virus isolate. In this study, we use sequences of HA, PB2, PB1, PA and  
134 NP segments. Outlier sequences (different from other sequences in the same year at more than 100 sites)  
135 and sequences containing symbols other than A, C, G and T were discarded.

136

### 137 **Statistics for inter-segmental genetic correlation**

138 Robinson-Foulds distance (RFD; ROBINSON AND FOULDS 1981) was calculated between evolutionary  
139 trees from different viral segments to quantify incongruence between their topologies. Neighbor-joining  
140 trees constructed from individual segments were fed into TreeDist in PAUP 4 test version (SWOFFORD  
141 2003).

142 The standard measure of linkage disequilibrium (LD) for a pair of bi-allelic sites,  $\rho^2$ , is calculated as

$$143 \quad \rho^2 = \frac{D^2_{AB}}{p_A(1-p_A)p_B(1-p_B)} \quad (1)$$

144 where  $p_A$  is the frequency of allele  $A$  at locus 1 and  $p_B$  is the frequency of allele  $B$  at locus 2 and  $D_{AB}$  is  
145  $p_{AB} - p_A p_B$  (HILL AND ROBERTSON 1968). To quantify LD between segments,  $\rho^2$  is calculated for each  
146 pair of sites, one on segment 1 and another on segment 2. The average of all such pairs is given by  $\bar{\rho}_{12}$ .

147 We define a metric that quantifies between-segment LD relative to within-segment LD as

$$148 \quad \lambda = \frac{\bar{\rho}_{12}}{\bar{\rho}_2} \quad (2)$$

149 where  $\bar{\rho}_2$  is the mean of  $\rho^2$  between all pairs of sites within segment 2, which is either a non-HA  
150 segment in actual data or a segment that evolves without positive selection in simulation (see below).

151 Topology based linkage disequilibrium (TBLD), proposed recently by WIRTZ *et al.* (2018) as an  
152 improvement over conventional SNP-based LD, is obtained by grouping sequences of a segment into  
153 two alleles defined by tree topology, as illustrated in Figure 1. Then,  $\rho^2$  is calculated between segments  
154 using the frequencies of such topology-based alleles. For this analysis, neighbor-joining trees  
155 constructed above for Robinson-Foulds metric were used again.

156 The above metrics were calculated for 30 genomic sets (from either actual H3N2 or simulated  
157 population) randomly sampled within each 6-month time window. For H3N2 data, sequences from  
158 different regions (Asia, Europe, North America, South America, Oceania and others) were sampled  
159 proportionally to the number of sequences in the database. For a given metric, the average value over

160 time windows, from year 2007 to 2016 for H3N2 data or over 10 simulation years, was obtained.

161

## 162 **Simulation**

163 We conducted the individual-based simulation of virus evolution in a procedure described in KIM AND  
164 KIM (2016) with modification. In this study, a virus consists of two segments, each containing 1,000 bi-  
165 allelic sites. Segment 1 is modeled after the HA1 segment and have 770 “nonsynonymous” sites  
166 including  $L_b$  “epitope” sites where beneficial mutations occur to increase viral fitness by  $s$ . On the other  
167 hand, segment 2 does not have epitope sites. Other sites on segment 1 or 2 are either under negative  
168 selection ( $770 - L_b$  nonsynonymous sites that mutate to deleterious alleles with selection coefficient  $s_d$ )  
169 or under neutral evolution ( $L_s = 230$  “synonymous” sites). The population evolves in discrete  
170 generations, with one generation corresponding to 1/80 year. Mutation rate per site per year is given by  
171  $\mu = 8.0 \times 10^{-3}$  ( $10^{-4}$  per generation) which is approximately the estimate of per-nucleotide mutation rate  
172 in H3N2 viruses.

173 As described in KIM AND KIM (2016), after steps of migration and mutation, a Poisson number of  
174 progenies are produced per a parental copy of virus as a function of its absolute fitness, which is  
175 obtained by multiplying its relative fitness (after combining effects of all beneficial and deleterious  
176 mutations) by the ratio of population size to carrying capacity ( $K$ ) at each generation. Let  $N$  be the  
177 number of viruses after these steps of reproduction. Then, we randomly select two viruses that exchange  
178 their segments with probability 0.5. This step is repeated  $Nr$  times. Therefore, the rate of reassortment  
179 per viral lineage per generation is  $r$ .

180 Four evolutionary models are considered. First, in model 1, both segments are subjected only to genetic  
181 drift in a near constant-sized population (thus  $s = s_d = 0$ ). Here, carrying capacity ( $K = 140 \approx N$ ) was  
182 given to yield  $\pi_1 = 0.027$ , the mean pairwise sequence difference per site in segment 1, which



183 corresponds to the observed synonymous diversity in the HA segment of H3N2 population. We also  
184 consider models with recurrent positive selection without (model 2;  $s_d = 0$ ) or with (model 3;  $s_d > 0$ )  
185 negative selection at other nonsynonymous sites on both segments. The strength of positive selection,  
186  $s$ , is set either 0.05 or 0.1, as we previously estimated  $s$  to range between 0.05 and 0.11 by examining  
187 how rapidly the frequencies of known antigenic-cluster-changing variants (KOEL *et al.* 2013) increase  
188 over time (KIM AND KIM 2016). In all models with selection,  $N$  was adjusted to yield  $\pi_1$  very close to  
189 0.027. Other evolutionary parameters relevant for segment 1 in model 2 and model 3 are identical to  
190 those of Model A and Model B1 ( $L = 1,000$ ), respectively, in KIM AND KIM (2016). Finally, we examine  
191 the model of positive selection only, but together with metapopulation dynamics (model 4;  $s = 0.1$  and  
192  $s_d = 0$ ). This model uses the same parameter values as in the Model C3a (constant carrying capacity in  
193 tropical region) of KIM AND KIM (2016). Briefly, the metapopulation consists of ten local demes, each  
194 of which sends migrants in proportion to its size to other demes. Five and two demes are colonized in  
195 “winter” and “summer”, respectively, and go extinct in the next season. A remaining deme, modeling a  
196 tropical population with continuous influenza epidemics, however is maintained without extinction.

197

## 198 **Synonymous diversity and divergence**

199 To obtain synonymous diversity  $\pi$  for each segment, mean pairwise synonymous difference among  
200 sequences sampled within a 6-month window was calculated according to Nei-Gojobori method (NEI  
201 AND GOJOBORI 1986). Then, the average over 20 years from 1997 to 2016 (40 time windows) was  
202 obtained. Synonymous diversity corrected for mutation rate,  $\pi^*$ , is obtained by dividing  $\pi$  by the  
203 synonymous divergence of corresponding segment from 1997 to 2016 (see below). Tajima’s D (TAJIMA  
204 1989) was also calculated for 30 sequences in each of the above 6-month windows and the average over  
205 windows was obtained.

206 To estimate synonymous divergence, which is the number of nucleotide substitutions per synonymous

207 sites, we reconstructed phylogeny for each PB2, PB1, PA, HA and NP segment. We tracked ancestral  
208 sequences at all internal nodes of phylogeny on a path starting from tree root to sequences sampled at  
209 each year and counted the cumulative number of synonymous changes on the path. Measuring  
210 cumulative divergence along the phylogeny, rather than just calculating synonymous differences  
211 between two terminal years of sampling, prevents multiple nonsynonymous changes at one site being  
212 counted as a synonymous change, especially in HA1 domain, or multiple synonymous changes at one  
213 sites being counted as a smaller number of changes. Neighbor-joining trees were reconstructed using  
214 PAUP with 30 sub-sampled sequences per year from 1973 to 2016 from all available sequences from  
215 Genbank. The trees were rooted to the common ancestor of sequences collected in 1973 because, across  
216 all segments, these sequences exhibit very little diversity and therefore their common ancestor is  
217 confidently dated to the same year. Internal node states were inferred to track synonymous changes  
218 along the branch using ACCTRAN method in PAUP. For this analysis, we used either four-fold  
219 synonymous sites or all synonymous sites. To obtain synonymous divergence for the latter, we used the  
220 Nei-Gojobori method.

221 To test whether the rate of sequence divergence at one segment is significantly different from that of  
222 another segment, bootstrap test was performed according to (HALL AND WILSON 1991). Let  $d_X$  and  $d_Y$   
223 be the divergence of segment  $X$  and  $Y$ . Then we define  $\hat{\theta} = |d_X - d_Y|$  and test if it is significantly  
224 greater than zero. As the distribution of  $\hat{\theta}$  under the null hypothesis ( $d_X = d_Y$ ) can be approximated by  
225 the distribution of  $\hat{\theta}^* - \hat{\theta}$ , where  $\hat{\theta}^* = |d_X^* - d_Y^*|$  is a bootstrap value of  $\hat{\theta}$ , the P-value is  
226 approximately the proportion of bootstrap samples that satisfy  $\hat{\theta}^* - \hat{\theta} > \hat{\theta}$ . For each pair of segments,  
227  $\hat{\theta}$  was obtained from divergences from 1973 to 2016 calculated by the above method. A pseudo data  
228 set is prepared by randomly sampling triplet-codon columns in the alignment of a given segment with  
229 replacement until it has the same number of codons as the original sequence. For bootstrap test, 1000  
230 pseudo data sets for each segment pair were generated.

231

232 **Data availability statement**

233 The authors affirm that all data necessary for confirming the conclusions of this article are represented  
234 fully within the article and its tables and figures

235

236

RESULTS

237

238 **The estimation of inter-segmental reassortment rate in influenza virus H3N2**

239 Population genetic processes at different segments become uncorrelated as reassortment occurs.  
240 Therefore, we attempted to infer reassortment rate in H3N2 viruses using multiple summary statistics  
241 that measure correlation in the patterns of sequence diversity across segments. One metric we use is  
242 Robinson-Foulds distance (RFD) between evolutionary trees, each of which is constructed from  
243 sequences of one particular segment (ROBINSON AND FOULDS 1981). As a measure of tree incongruity,  
244 RFD is expected to be positively correlated with reassortment rate. On the other hand, linkage  
245 disequilibrium (LD) between polymorphism on different segments is expected to decay with an  
246 increasing rate of reassortment. We consider two summary statistics (metrics) of inter-segmental LD,  $\lambda$   
247 and TBLD (see Methods).

248 To investigate whether these metrics are sufficiently informative and robust for inferring reassortment  
249 rate, we performed simulation of virus population in which two segments (one modeling the HA  
250 segment and the other a non-HA segment) are undergoing varying rates of reassortment ( $r = 0$  to  $10^{-2}$ ).  
251 The relationship between a given metric and reassortment rate may depend on the pattern of sequence  
252 diversity, which is determined by how viruses evolve. We therefore simulated virus population under  
253 four distinct population genetic models: simple neutral evolution (model 1), recurrent positive selection  
254 (selective sweeps; model 2), recurrent positive and negative selection (model 3), and positive selection

255 under complex demographic dynamics (model 4). Parameters of each evolutionary model were adjusted  
256 to yield a constant level of synonymous sequence diversity (or effective population size  $N_e \approx 140$ ) and  
257 constant rate of adaptive substitutions ( $k \approx 1.3$ ) at the first segment, matching those at the HA segment  
258 of H3N2 population (BHATT *et al.* 2011; KIM AND KIM 2016).

259 All three metrics change monotonically (increase in RFD and decrease in  $\lambda$  and TBLD) with increasing  
260 reassortment rate, particularly in the range where  $r$  is between  $10^{-3}$  and  $10^{-2}$  ( $N_e r \cong 0.1 \sim 1$ ) (Figure 2).  
261 RFD responds most sensitively to  $r$ : the distribution of RFD for a given  $r$  is relatively narrow compared  
262 to the change of mean with increasing  $r$ . However, the absolute values of RFD changes significantly  
263 depending on the evolutionary models in the simulation. On the other hand,  $\lambda$  and TBLD exhibit larger  
264 variances but are less sensitive to evolutionary models.

265 We calculated these three metrics from HA-PB2, HA-PB1, HA-PA and HA-NP segment pairs in  
266 influenza H3N2 (Table 1). We do not observe clear difference in reassortment rates among these  
267 segment pairs. For example, TBLD is smallest between HA and PA but  $\lambda$  is largest for this pair. We  
268 therefore take averages over segment pairs and compare them to the simulation results above (see  
269 horizontal lines in Figure 2). The agreement between observation and simulation is generally poor for  
270  $r < 10^{-3}$  or  $r = 10^{-2}$ . Within the range between  $10^{-3}$  and  $10^{-2}$ , the most likely value of  $r$  (judged by  
271 difference between the empirical value and the mean of simulated distribution) depends on the  
272 combination of metric and simulation model. This may suggest that relationship between each metric  
273 and reassortment rate varies according to the pattern of sequence polymorphism in the population or,  
274 equivalently, the topology of evolutionary trees shaped by selection and population structure.

275 A well-known summary statistic for tree topology is Tajima's  $D$  (Tajima 1983). We computed Tajima's  
276  $D$ , modified for longitudinally sampled sequences (see Methods), for each segment in actual and  
277 simulated data (Table 2, Table S1). Simulation under model 4 yields the values of Tajima's  $D$  that closely  
278 match the value from the HA segment of H3N2. Therefore, given the hypothesis that tree topology

279 modulates the response of our metrics to reassortment rate, the estimates of  $r$  under model 4 might be  
280 more sensible than under other models. In this case, based on RFD  $r$  is estimated to be between 0.002  
281 and 0.005. However, it is not clear yet whether Tajima's  $D$  captures the aspect of tree topology that  
282 modulate the outcome of reassortment or it is tree topology alone that matters. For instance, the  
283 relationship between  $r$  and RFD is quite different in models 2 and 3, which however yield similar values  
284 of Tajima's  $D$  (Table S1).

285 Given that  $r$  is at least 0.002 under the assumption of 80 generations per year, there are approximately  
286  $1 - (1 - 0.002)^{80} \approx 0.15$  reassortments per year per viral lineage: namely, one copy of the HA  
287 segment and one copy of a non-HA segment found in one virus trace back to two different ancestral  
288 viruses of the previous year with more than 15% chance. We confirmed that this per-year estimate does  
289 not change when one generation is given 1/160 or 1/40 year (Figure S1).

290 We next examine how well our inference on reassortment rate matches the result of widely-used method  
291 of identifying reassortment events through phylogenetic graph-mining. Using GiRaF (Graph-  
292 incompatibility-based Reassortment Finder; NAGARAJAN AND KINGSFORD 2010), we obtained the  
293 candidate sets of reassorted taxa when phylogenies are compared in HA-PB2, HA-PB1, HA-PA, and  
294 HA-NP segment pairs (Table 1) and between two segments in the above simulation (Table 3).  
295 Simulations show that the numbers of detected reassortments vary greatly according to evolutionary  
296 model. Models 2 and 3 lead to a larger number of detection for a given value of  $r$ . This might be because  
297 single-branch reassortments are more detectable with GiRaF (NAGARAJAN AND KINGSFORD 2010) and  
298 genealogies produced under these models have longer outer branches (thus more negative Tajima's  $D$ ).  
299 With models 1 and 4 (2 and 3), simulation with  $r = 10^{-3}$  (smaller than  $10^{-3}$ ) leads to the number of  
300 detections similar to that observed in actual viral sequences. Therefore, based on the number of GiRaF-  
301 detected reassortment events as a summary statistic, a smaller estimate of  $r$  is inferred relative to that  
302 obtained above using RFD,  $\lambda$ , or TBLD. It however needs to be investigated whether simulated  
303 sequences generated under idealized models have allowed better phylogenetic inference and thus more

304 sensitive detection of reassortments.

305 Conversely, reassortment rate  $r$  can be translated into the number of reassortment events on the  
306 phylogeny of sampled sequences, which GiRaF targets. Focusing on a specific pair of segments,  
307 probability that at least one of two randomly sampled viruses is a reassortant (namely, going backward  
308 in time one viral lineage experience reassortment before the coalescence of two lineages occurs) is  
309 given approximately by  $P^{(2)} \equiv 2r/(1/N_e + 2r) = 2N_e r/(2N_e r + 1)$ . Then, assuming  $r = 0.001$  and  
310  $N_e = 140$ ,  $P^{(2)}$  is about 0.22. With  $r = 0.005$  it is about 0.58. Recently, using GiRaF, BERRY *et al.* (2016)  
311 estimated that about 40% of H3N2 sequences are reassortants, looking at all eight segments. Therefore,  
312 the probability of sampling at least one reassortant out of two is  $1 - 0.6^2 \approx 0.64$ . Assuming that a random  
313 set of segments are exchanged at a reassortment event, this corresponds approximately to  $P^{(2)} = 0.64/2$   
314  $= 0.32$ . Considering that GiRaF cannot detect all reassortment events in the sampled genealogy  
315 (NAGARAJAN AND KINGSFORD 2010), we may conclude from this result that the number of reassortment  
316 events detected by direct identification of incongruent tree branches is compatible with our estimate of  
317  $r$  being on the order of 0.001 ( $\sim 0.1$  per year).

318

### 319 **Reassortment rate and the inter-segmental pattern of sequence diversity and divergence**

320 Reassortment is critical in shaping the genomic pattern of genetic variation under the effect of selective  
321 sweeps and background selection. The more frequent reassortment is, the smaller neutral genetic  
322 variation is on a segment under positive selection relative to other segments evolving in more neutral  
323 manner. We investigate what range of reassortment rate is compatible with the relative levels of neutral  
324 sequence diversity in HA vs. non-HA segments of H3N2. We first calculated synonymous sequence  
325 diversities (mean pairwise synonymous differences;  $\pi$ ) at the HA, PB2, PB1, PA and NP segments of  
326 H3N2 viruses, using sequences sampled from 1997 to 2016 (Table 2). These values however cannot be  
327 simply compared with each other because, if mutation rates are not uniform over segments, it can also

328 contribute to differences in neutral genetic diversity. Note that the RNA segments of influenza virus  
329 may replicate independently within a host and thus can accumulate mutations at different rates.

330 Inter-segmental heterogeneity in mutation rate can be detected by differences in synonymous sequence  
331 divergence over time. We observe that synonymous substitutions from 1973 to 2016 occur at constant  
332 rates at respective segments (Figure 3), in remarkable agreement with molecular clock despite  
333 uncertainty regarding whether synonymous substitutions in influenza viruses are strictly neutral or the  
334 total number of replication per year is constant over different flu seasons or years. At the same time we  
335 note that the rates are variable across segments. For a given pair of segments, the significance of  
336 differences in synonymous divergences was evaluated by bootstrapping (Table 4). We find that  
337 divergences at HA and PB1 segments, calculated either from four-fold synonymous sites only (Figure  
338 3A) or from all synonymous sites according to Nei-Gojobori method (Figure 3B), are significantly  
339 larger than other segments. One may question whether frequent nonsynonymous substitutions in the  
340 HA segment have an (unknown) effect of elevating the rate of synonymous substitutions at the same or  
341 nearby codons. To test this possibility we measured the synonymous divergences of HA1- and HA2-  
342 domain sequences separately. Unlike HA1, on which the epitope sites of hemagglutinin are located,  
343 HA2 domain is mainly under stabilizing selection similar to other non-HA genes (BHATT *et al.* 2011).  
344 Synonymous divergence at HA2, obtained from either 4-fold degenerate sites only or using Nei-  
345 Gojobori method, is actually larger than that of HA1, although the difference is not significant in the  
346 bootstrap test ( $p = 0.16$ ). Therefore, we may rule out the possibility that recurrent nonsynonymous  
347 substitutions at HA elevate the rates of synonymous mutations at the corresponding codons.

348 The level of neutral sequence diversity correcting for mutation rate heterogeneity, denoted as  $\pi^*$ , is then  
349 obtained by dividing  $\pi$  at each segment by its synonymous divergence between 1997 and 2016.  $\pi^*$  of  
350 HA is about half the level of other segments (Table 2). Synonymous diversity ( $\pi$ ) of HA before  
351 correction is already lower than those of other segments but the difference becomes larger after the  
352 correction. Differences in  $\pi^*$  among non-HA segments are small. This result confirms the concentration

353 of positive selection causing selective sweeps on the HA segment.

354 We next examined which value of  $r$  best explains the ratio of  $\pi^*$  on HA versus non-HA segments. In  
355 simulations described above, we calculated neutral diversity on segment 1 and 2,  $\pi_1$  and  $\pi_2$ , and obtained  
356 their ratio ( $\pi_1/\pi_2$ ) (Figure 4). Since mutation rate is constant in simulation, diversity needs no correction  
357 by divergence. We find that reassortment rate close to (in models 2 and 3) or larger than (in model 4)  
358 0.01 best explains the HA vs. non-HA ratio of  $\pi^*$  for both  $s = 0.1$  (Figure 4) and  $s = 0.05$  (Figure S2)  
359 This result is not dependent on the frequency of positive selection that we vary to yield different  $k$ , the  
360 number of advantageous substitution per year (Figure S3). Note that the estimate of  $r$  using correlation  
361 statistics (RFD,  $\lambda$ , and TBLD) above is smaller than 0.01. Why a higher rate of reassortment in selective  
362 sweep simulations, particularly for model 4, is compatible with  $\pi_{\text{HA}}/\pi_{\text{non-HA}}$  needs explanation (see  
363 Discussion).

364 To gain further insight on the above result and the dynamics of recurrent selective sweeps, we sought a  
365 simple analytic approximation to  $\pi_1/\pi_2$  using the following heuristic argument. Consider model 2 in  
366 which positive selection occurs recurrently in segment 1, generating an equilibrium flux of beneficial  
367 alleles reaching fixation in a single constant-sized population. Discrete events of sweeps can be arranged  
368 in order, backward in time: let allele  $B_1$  be a beneficial allele that was fixed in the last sweep. (There  
369 can be multiple beneficial alleles at different sites being fixed together at a single episode of sweep due  
370 to temporal clustering of substitutions (KIM AND KIM 2015). In that case,  $B_1$  represents the one that  
371 originated by most recent mutation.) The beneficial alleles fixed in the preceding rounds of sweeps are  
372 defined as  $B_2$ ,  $B_3$ , and so on. The allele frequency of  $B_i$  is given by  $x_i$ . Two randomly chosen copies of  
373 segment 1 have their most recent common ancestor at  $t_1$  generations back in time. We may assume that  
374  $t_1$  is distributed with mean  $\tau_1$  that is determined only by the rate of selective sweeps. Namely,  
375 coalescence due to genetic drift during time interval between successive sweeps is ignored. Then,  
376 tracing events backward in time from present, coalescence occurs as  $x_1$  approaches close to zero.  
377 Therefore  $t_1$  should be slightly smaller than waiting time until the time of  $B_1$ 's entrance into the



378 population. It is also possible that, at the time of sampling lineages, there is a currently sweeping  
379 beneficial allele that has not reached fixation. If both sampled lineages carry this sweeping allele, their  
380 coalescence should occur close to the time of this beneficial allele's entrance. Here we simply define  $\tau_1$   
381 as the mean of  $t_1$  when all of such possibilities under the equilibrium flux of beneficial alleles are taken  
382 into account.

383 With complete linkage ( $r = 0$ ), identical backward-in-time process governs the coalescence of randomly  
384 sampled lineages in segment 2 and their mean coalescent time is  $\tau_1$ . However, with  $r > 0$  two lineages  
385 may avoid coalescence by reassortment: at a given generation, each lineage can recombine away from  
386  $B_1$  allele with probability  $r(1 - x_1)$ . Given that  $r/s \ll 1$ , where  $s$  is the strength of selection, the probability  
387 of such a lineage recombining back to  $B_1$  is very small and thus can be ignored. The opportunity for a  
388 lineage to recombine away increases as  $x_1$  remains longer at low values (but not too low forcing  
389 coalescence). Therefore, the length of trajectory  $x_1$  determines the probability of escaping coalescence.  
390 While  $x_1$  should increase from  $1/N$  to 1, forward-in-time, stochastic effect makes the trajectory much  
391 shorter than the length of deterministic trajectory: the change of  $x_1$  is approximated by instantaneous  
392 increase from  $1/N$  to  $1/(Nf)$ , where  $f$  is the fixation probability of a copy of beneficial allele (MAYNARD  
393 SMITH 1971), followed by deterministic increase expected for selective advantage  $s$ . Then, using the  
394 approximation obtained in (BARTON 2000) and other studies, the probability of escaping coalescence  
395 in one round of sweep is given by

$$396 \quad P_e \approx 1 - (N_e f)^{-2r/s} \quad (3)$$

397 where  $N_e$  is the effective population size under which sweeps occur (i.e,  $N_{e1}$  of (KIM AND KIM 2016)).  
398 Now, two lineages that have just escaped coalescence are subject to coalescence in the next (earlier)  
399 round of sweep by  $B_2$ . Assuming that successive sweeps occur as a random Poisson process, the waiting  
400 time until  $x_2$  becomes small enough to force coalescence is again  $\tau_1$ . Then, if the lineages coalesce in  
401 the  $n^{\text{th}}$  round of sweep, it takes on average  $n\tau_1$  generations. Therefore, the mean coalescent time for

402 segment 2 is

$$403 \quad \tau_2 = \sum_{n=1}^{\infty} P_e^{n-1} (1 - P_e) n \tau_1 = \frac{\tau_1}{1 - P_e}. \quad (4)$$

404 The level of sequence diversity on segment 1 relative to that on segment 2 is therefore

$$405 \quad \frac{E[\pi_1]}{E[\pi_2]} = \frac{2\mu\tau_1}{2\mu\tau_2} = 1 - P_e \approx (N_e 1 f)^{-2r/s}. \quad (5)$$

406 This approximation shows that  $\pi_1/\pi_2$  does not depend on the rate of recurrent positive selection ( $k$ ) but  
407 on the strength of selection, in agreement with our simulation (Figure S3).

408 We compared the simulation results of model 2 with Eq. (5) in which  $f$  is replaced by either  $2s$ , a usual  
409 approximation under infrequent selective sweeps, or mean fixation probability observed in simulation.  
410 The latter is 0.0269 for  $s = 0.1$  and 0.0253 for  $s = 0.05$ . Therefore, actual fixation probabilities are much  
411 smaller than  $2s$ , indicating that strong clonal interference occurs in our simulated populations (i.e. under  
412 parameters constrained to yield both  $\pi_1 \approx 0.027$  per site and  $k \approx 1.3$  per year). Figure 5 shows that  $\pi_1/\pi_2$   
413 predicted by eq. (5), using either choices of  $f$ , is much smaller than that observed in simulation. Namely,  
414 lineages on segment 2 in simulation do not escape coalescence as frequently as predicted under the  
415 assumption of eq. (5), producing  $\pi_2$  not so larger than  $\pi_1$ . It might be suggested that, in addition to the  
416 initial acceleration of  $x_i$  by a factor of  $1/f$ ,  $x_i$  would increase much faster than expected with selection  
417 coefficient  $s$  under clonal interference, because successful beneficial mutations reaching fixation tend  
418 to form temporal clusters, i.e. in positive linkage disequilibrium with each other (STRELKOWA AND  
419 LASSIG 2012; KIM AND KIM 2015). However, when we estimated the “effective” selection coefficients  
420 of beneficial alleles by counting generations that the sample frequency of  $x_i$  takes to increase from  $\sim 0.2$   
421 to  $\sim 0.8$  for all trajectories in simulation with  $s = 0.1$ , the mean was 0.069. We therefore did not obtain  
422 an evidence of faster increase in  $x_i$  by clonal interference. It remains to be investigated what causes  
423 coalescence to occur faster, relative to recombination, than expected by eq. (5).

424

425

## DISCUSSION

426 The population genetics of sexually reproducing organisms demonstrated that recombination rate is as  
427 important as other fundamental evolutionary parameters, such as mutation rate, effective population  
428 size, and selection coefficient, for understanding their evolution and genetic diversity. Therefore, in  
429 order to build a correct model that predicts the direction of influenza viral evolution, the rate of  
430 reassortment relative to other parameters needs to be estimated. While reassortment occurs in all 28  
431 pairs of influenza viral segments, this study focused on reassortment between the HA segment, the  
432 major target of strong positive selection, and one of four non-HA segments (PB2, PB1, PA, NP) that are  
433 generally considered to evolve neutrally (BHATT *et al.* 2011), because such reassortment is expected to  
434 cause difference in inter-segmental difference in genetic diversity and is therefore key to inferring  
435 positive selection in influenza virus. The NA (neuraminidase) segment was not included among non-  
436 HA segments because, with epistatic interactions detected between HA and NA genes (NEVEROV *et al.*  
437 2014), particular reassortants may have higher or lower fitness relative to non-reassortants and can thus  
438 bias the estimate of reassortment rate. MP and NS segments, also known to undergo little positive  
439 selection, were not included because their synonymous sites are not likely to evolve neutrally due to  
440 overlapping protein-coding regions. We used multiple summary statistics of correlation or congruence  
441 between segmental sequence diversity to infer the range of reassortment rate in the H3N2 viral  
442 population. In general, it is suggested that the probability of reassortment per virus per viral infection  
443 cycle is between 0.001 and 0.01. Ideally, information from multiple summary statistics might be  
444 combined to yield a narrower range of estimate for example using approximate Bayesian computation  
445 (ABC) (BEAUMONT *et al.* 2002). However, our individual-based simulation was too slow for such  
446 implementation. It might be possible in the future to develop a coalescent-based simulation that is fast  
447 enough for ABC. Since relationships between the summary statistics and reassortment rate depends on  
448 the evolutionary model of virus, such approach will have to estimate reassortment rate jointly with other

449 parameters of selection and demography.

450 Reassortment rate determines the hitchhiking effect of recurrent positive selection at the HA segment  
451 on neutral genetic variation at other segments (Figure 4). Our simulation results suggest that more  
452 frequent reassortment ( $r \geq 0.01$ ) than inferred above using correlation statistics (i.e.  $0.001 \leq r < 0.01$ ) is  
453 needed to explain ~40% lower synonymous diversity on HA relative to those on non-HA segments,  
454 particularly under complex demography (model 4). Given that our earlier inference of  $r < 0.01$  is correct,  
455 this discrepancy would indicate that, for a given  $r$ , neutral lineages on non-HA segments escape  
456 hitchhiking (i.e. avoid coalescence forced by a sweep) more frequently than expected under the  
457 simulation models. It might be because our simulation models use reassortment rates that are constant  
458 in the course of selective and demographic dynamics (even in model 4). Namely, it assumes that hosts  
459 experience a constant rate of coinfection through time. This is not likely true in the H3N2 population,  
460 in which coinfection must be more frequent during the seasonal peaks of population size (the number  
461 of hosts infected). Then, if a new immunity-evading adaptive allele is more likely to arise during peaks  
462 of influenza epidemics, as expected from the principle that mutational input is proportional to  
463 population size and the fixation probability of adaptive allele is larger during the period of population  
464 size expansion (OTTO AND WHITLOCK 1997), this adaptive allele may be transmitted through coinfecting  
465 hosts more frequently, thus participating in more reassortment, than non-adaptive alleles. Therefore,  
466 because hitchhiking effect is mostly determined during the early phase when the adaptive variant is still  
467 in low frequency (MAYNARD SMITH AND HAIGH 1974), the observed ratio of HA to non-HA  
468 synonymous diversity can be explained by an effectively higher reassortment rate experienced by  
469 antigenic variants on the HA segment. Further investigation on adaptive evolution and inter-segmental  
470 diversity in influenza virus will require a theoretical/simulation model that allows realistic seasonal  
471 influenza dynamics and associated change in coinfection/reassortment rate.

472 Wider discrepancy between data and the model of positive selection under metapopulation structure  
473 (model 4 in Figure 4) demands further theoretical explanations. At first, it is known that the spatial

474 structure of a population slows down the spread of a beneficial allele across demes, thus weakening the  
475 hitchhiking effect as there are more opportunities for neutral lineages to recombine away from the  
476 beneficial allele (KIM AND MARUKI 2011; BARTON *et al.* 2013). This contradicts with our result: if  
477 hitchhiking effect is weaker,  $\pi_1/\pi_2$  should become smaller for a given  $r$ . However, demographic model  
478 assumed in those studies are quite different from the one used here. In our model 4, seven out of eight  
479 demes undergo extinction-recolonization cycles. While a beneficial allele is increasing in frequency in  
480 the total population, “empty” demes are more likely to be colonized by viruses carrying this than the  
481 ancestral allele. (Note that our model assigns the absolute fitness to haploid individuals so that a local  
482 population can be established even from a single immigrant (KIM AND KIM 2016).) Because no or small  
483 number of individuals carrying the non-beneficial allele exist where those carrying beneficial allele  
484 increase exponentially, neutral lineages on segment 2 can hardly escape coalescence, thus resulting in  
485 stronger reduction in polymorphism. This stronger hitchhiking effect during the establishment of a new  
486 local population was demonstrated in the model of “Genotype-Dependent Colonization and  
487 Introgression (GDCI)” in KIM AND GULISIJA (2010). Unless  $r$  is very larger than 0.01 (or the joint effect  
488 of selection and co-infection dynamics increasing the effective recombination rate considered above is  
489 very dramatic), the overestimation of  $\pi_1/\pi_2$  by model 4 may suggest that selective sweeps in the actual  
490 population of H3N2 do not occur predominantly through GDCI process. While the transmission of  
491 influenza virus in most regions of northern and southern hemispheres is seasonal, continuous year-round  
492 transmission occurs in certain tropical or subtropical regions (VIBOUD *et al.* 2006). Selective sweeps in  
493 such continuous viral populations would not involve the GDCI process. Therefore, if global influenza  
494 genetic diversity is mainly shaped by variants arising from the permanent tropical populations  
495 (RAMBAUT *et al.* 2008; CHAN *et al.* 2010), the overall effects of selective sweeps might be closer to  
496 those in our models 2 and 3. In our simulation of model 4, one out of eight demes are maintained at a  
497 constant size. Its small size however might have limited its contribution to the diversity of the total  
498 population.

499 While not initially a major focus of this study, significant inter-segmental heterogeneity in the rate of  
500 synonymous substitutions, indicating that new mutations occur at different rates in different segments,  
501 is an unexpected discovery. Negative-sense viral RNA strands replicate via positive-sense mRNA  
502 strands. Then, if segments are transcribed at different rates for example due to different demands for or  
503 turn-over rates of viral proteins, some segments may experience more negative-positive-negative  
504 replication cycles than others before being assembled into viral particles. Such difference would  
505 translate into different mutation rates given the fixed rate of RNA replication errors per cycle. We may  
506 also speculate that replication error is influenced by the secondary structures of RNA strands that are  
507 probably different among segments.

508

509

#### ACKNOWLEDGMENT

510

511 This research was supported by the National Research Foundation of Korea grants  
512 2012R1A1A2004932 to YK.

513

514

#### LITERATURE CITED

515

516 Barton, N. H., 2000 Genetic hitchhiking. *Philosophical Transactions of the Royal Society B: Biological Sciences*  
517 355: 1553-1562.

518 Barton, N. H., A. M. Etheridge, J. Kelleher and A. Véber, 2013 Genetic hitchhiking in spatially extended  
519 populations. *Theoretical population biology* 87: 75-89.

520 Beaumont, M. A., W. Zhang and D. J. Balding, 2002 Approximate Bayesian Computation in Population Genetics.  
521 *Genetics* 162: 2025-2035.

522 Bedford, T., S. Cobey, P. Beerli and M. Pascual, 2010 Global migration dynamics underlie evolution and  
523 persistence of human influenza A (H3N2). *PLoS pathogens* 6: e1000918.

- 524 Bedford, T., S. Cobey and M. Pascual, 2011 Strength and tempo of selection revealed in viral gene genealogies.  
525 *BMC Evolutionary Biology* 11: 220.
- 526 Berry, I. M., M. C. Melendrez, T. Li, A. W. Hawksworth, G. T. Brice *et al.*, 2016 Frequency of influenza H3N2  
527 intra-subtype reassortment: attributes and implications of reassortant spread. *BMC biology* 14: 117.
- 528 Bhatt, S., E. C. Holmes and O. G. Pybus, 2011 The genomic rate of molecular adaptation of the human influenza  
529 A virus. *Mol Biol Evol* 28: 2443-2451.
- 530 Buonagurio, D. A., S. Nakada, J. D. Parvin, M. Krystal, P. Palese *et al.*, 1986 Evolution of human influenza A  
531 viruses over 50 years: rapid, uniform rate of change in NS gene. *Science* 232: 980-982.
- 532 Chan, J., A. Holmes and R. Rabadan, 2010 Network analysis of global influenza spread. *PLoS Comput Biol* 6:  
533 e1001005.
- 534 Charlesworth, B., M. T. Morgan and D. Charlesworth, 1993 The effect of deleterious mutations on neutral  
535 molecular variation. *Genetics* 134: 1289-1303.
- 536 Dudas, G., T. Bedford, S. Lycett and A. Rambaut, 2014 Reassortment between influenza B lineages and the  
537 emergence of a coadapted PB1–PB2–HA gene complex. *Molecular biology and evolution* 32: 162-172.
- 538 Ferguson, N. M., A. P. Galvani and R. M. Bush, 2003 Ecological and immunological determinants of influenza  
539 evolution. *Nature* 422: 428-433.
- 540 Fitch, W. M., R. M. Bush, C. A. Bender and N. J. Cox, 1997 Long term trends in the evolution of H(3) HA1  
541 human influenza type A. *Proc Natl Acad Sci U S A* 94: 7712-7718.
- 542 Fitch, W. M., J. M. Leiter, X. Q. Li and P. Palese, 1991 Positive Darwinian evolution in human influenza A viruses.  
543 *Proc Natl Acad Sci U S A* 88: 4270-4274.
- 544 Hall, P., and S. R. Wilson, 1991 Two guidelines for bootstrap hypothesis testing. *Biometrics*: 757-762.
- 545 Hill, W., and A. Robertson, 1968 Linkage disequilibrium in finite populations. *Theoretical and Applied Genetics*  
546 38: 226-231.
- 547 Holmes, E. C., E. Ghedin, N. Miller, J. Taylor, Y. Bao *et al.*, 2005 Whole-genome analysis of human influenza A  
548 virus reveals multiple persistent lineages and reassortment among recent H3N2 viruses. *PLoS biology* 3:  
549 e300.
- 550 Illingworth, C. J., and V. Mustonen, 2012 Components of selection in the evolution of the influenza virus: linkage  
551 effects beat inherent selection. *PLoS pathogens* 8: e1003091.
- 552 Ina, Y., and T. Gojobori, 1994 Statistical analysis of nucleotide sequences of the hemagglutinin gene of human  
553 influenza A viruses. *Proc Natl Acad Sci U S A* 91: 8388-8392.
- 554 Kim, K., and Y. Kim, 2015 Episodic Nucleotide Substitutions in Seasonal Influenza Virus H3N2 Can Be  
555 Explained by Stochastic Genealogical Process without Positive Selection. *Molecular Biology and*

- 556 Evolution 32: 704-710.
- 557 Kim, K., and Y. Kim, 2016 Population genetic processes affecting the mode of selective sweeps and effective  
558 population size in influenza virus H3N2. BMC evolutionary biology 16: 156.
- 559 Kim, Y., and D. Gulisija, 2010 Signatures of recent directional selection under different models of population  
560 expansion during colonization of new selective environments. Genetics 184: 571-585.
- 561 Kim, Y., and T. Maruki, 2011 Hitchhiking effect of a beneficial mutation spreading in a subdivided population.  
562 Genetics 189: 213-226.
- 563 Koel, B. F., D. F. Burke, T. M. Bestebroer, S. van der Vliet, G. C. Zondag *et al.*, 2013 Substitutions near the  
564 receptor binding site determine major antigenic change during influenza virus evolution. Science 342:  
565 976-979.
- 566 Lu, L., S. J. Lycett and A. J. L. Brown, 2014 Reassortment patterns of avian influenza virus internal segments  
567 among different subtypes. BMC evolutionary biology 14: 16.
- 568 Lycett, S., G. Baillie, E. Coulter, S. Bhatt, P. Kellam *et al.*, 2012 Estimating reassortment rates in co-circulating  
569 Eurasian swine influenza viruses. Journal of General Virology 93: 2326-2336.
- 570 Maynard Smith, J., 1971 What use is sex? Journal of theoretical biology 30: 319-335.
- 571 Maynard Smith, J., and J. Haigh, 1974 The hitch-hiking effect of a favorable gene. Genet. Res. 23: 23-35.
- 572 McDonald, S. M., M. I. Nelson, P. E. Turner and J. T. Patton, 2016 Reassortment in segmented RNA viruses:  
573 mechanisms and outcomes. Nature Reviews Microbiology 14: 448.
- 574 Nagarajan, N., and C. Kingsford, 2010 GiRaF: robust, computational identification of influenza reassortments via  
575 graph mining. Nucleic acids research 39: e34-e34.
- 576 Nei, M., and T. Gojobori, 1986 Simple methods for estimating the numbers of synonymous and nonsynonymous  
577 nucleotide substitutions. Molecular biology and evolution 3: 418-426.
- 578 Nelson, M. I., and E. C. Holmes, 2007 The evolution of epidemic influenza. Nat Rev Genet 8: 196-205.
- 579 Neverov, A. D., K. V. Lezhnina, A. S. Kondrashov and G. A. Bazykin, 2014 Intrasubtype reassortments cause  
580 adaptive amino acid replacements in H3N2 influenza genes. PLoS genetics 10: e1004037.
- 581 Otto, S. P., and M. C. Whitlock, 1997 The probability of fixation in populations of changing size. Genetics 146:  
582 723-733.
- 583 Pinsent, A., C. Fraser, N. M. Ferguson and S. Riley, 2015 A systematic review of reported reassortant viral lineages  
584 of influenza A. BMC infectious diseases 16: 3.
- 585 Pybus, O. G., A. Rambaut, R. Belshaw, R. P. Freckleton, A. J. Drummond *et al.*, 2007 Phylogenetic evidence for  
586 deleterious mutation load in RNA viruses and its contribution to viral evolution. Mol Biol Evol 24: 845-  
587 852.



- 588 Rabadan, R., A. J. Levine and M. Krasnitz, 2008 Non-random reassortment in human influenza A viruses.  
589 Influenza and Other Respiratory Viruses 2: 9-22.
- 590 Rambaut, A., O. G. Pybus, M. I. Nelson, C. Viboud, J. K. Taubenberger *et al.*, 2008 The genomic and  
591 epidemiological dynamics of human influenza A virus. Nature 453: 615-619.
- 592 Robinson, D. F., and L. R. Foulds, 1981 Comparison of phylogenetic trees. Mathematical biosciences 53: 131-  
593 147.
- 594 Schweiger, B., L. Bruns and K. Meixenberger, 2006 Reassortment between human A (H3N2) viruses is an  
595 important evolutionary mechanism. Vaccine 24: 6683-6690.
- 596 Simonsen, L., C. Viboud, B. T. Grenfell, J. Dushoff, L. Jennings *et al.*, 2007 The genesis and spread of  
597 reassortment human influenza A/H3N2 viruses conferring adamantane resistance. Molecular biology and  
598 evolution 24: 1811-1820.
- 599 Strelkova, N., and M. Lassig, 2012 Clonal interference in the evolution of influenza. Genetics 192: 671-682.
- 600 Swofford, D. L., 2003 PAUP\*: phylogenetic analysis using parsimony, version 4.0 b10.
- 601 Tajima, F., 1989 Statistical method for testing the neutral mutation hypothesis by DNA polymorphism. Genetics  
602 123: 585-595.
- 603 Viboud, C., W. J. Alonso and L. Simonsen, 2006 Influenza in tropical regions. PLoS medicine 3: e89.
- 604 Villa, M., and M. Lässig, 2017 Fitness cost of reassortment in human influenza. PLoS pathogens 13: e1006685.
- 605 Westgeest, K. B., C. A. Russell, X. Lin, M. I. Spronken, T. M. Bestebroer *et al.*, 2014 Genomewide analysis of  
606 reassortment and evolution of human influenza A (H3N2) viruses circulating between 1968 and 2011.  
607 Journal of virology 88: 2844-2857.
- 608 Wirtz, J., M. Rauscher and T. Wiehe, 2018 Topological linkage disequilibrium calculated from coalescent  
609 genealogies. bioRxiv.
- 610 Yang, Z., 2000 Maximum likelihood estimation on large phylogenies and analysis of adaptive evolution in human  
611 influenza virus A. J Mol Evol 51: 423-432.
- 612
- 613

614

615 Table 1. Correlation/incongruence measures for H3N2 viral segment pairs

| segment pair | RFD    | $\lambda$ | TBLD  | GiRaF<br>(2003-<br>2012) | GiRaF<br>(2007-<br>2016) |
|--------------|--------|-----------|-------|--------------------------|--------------------------|
| HA-PB2       | 446    | 0.740     | 0.537 | 6                        | 3                        |
| HA-PB1       | 445    | 0.771     | 0.666 | 8                        | 6                        |
| HA-PA        | 452    | 0.830     | 0.446 | 6                        | 5                        |
| HA-NP        | 456    | 0.665     | 0.617 | 5                        | 5                        |
| average      | 449.75 | 0.751     | 0.566 | 6.25                     | 4.75                     |

616

617

618

619 Table 2. Summary statistics of genetic variation for H3N2 viral segments

| segment | Tajima's<br>D | $\pi$ | $\pi^*$ | $\frac{\pi_{HA}^*}{\pi^*}$ |
|---------|---------------|-------|---------|----------------------------|
| PB2     | -1.43         | 0.029 | 0.172   | 0.628                      |
| PB1     | -1.45         | 0.032 | 0.212   | 0.508                      |
| PA      | -1.62         | 0.028 | 0.201   | 0.538                      |
| HA      | -1.46         | 0.023 | 0.108   | -                          |
| NP      | -1.60         | 0.028 | 0.199   | 0.543                      |
| average |               |       |         | 0.554                      |

620

621 Note: Synonymous diversity ( $\pi$ ) was estimated from each segment using sequences sampled between  
622 1997 and 2016.  $\pi^*$  is corrected synonymous diversity obtained by dividing  $\pi$  by synonymous divergence  
623 from 1997 to 2016 to remove the effect of heterogeneous mutation rate across segments.

624

625

626 Table 3. The number of candidates sets of reassorted taxa (GiRaF-detected reassortment events) in  
627 simulated data.

| $r$                | Model 1 | Model 2 | Model 3 | Model 4 |
|--------------------|---------|---------|---------|---------|
| $10^{-4}$          | 0.45    | 1.25    | 1.31    | 0.62    |
| $10^{-3}$          | 4.75    | 12.76   | 12.01   | 4.74    |
| $2 \times 10^{-3}$ | 10.1    | 24.71   | 23.62   | 11.03   |
| $5 \times 10^{-3}$ | 22.94   | 49.27   | 26.56   | 16.97   |
| $10^{-2}$          | 38.81   | 69.84   | 71.69   | 40.11   |

628

629

630 Table 4. Bootstrap test for heterogenous divergence rate

631

| Segment | Synonymous sites |     |    |    | Fourfold synonymous sites |     |     |    |
|---------|------------------|-----|----|----|---------------------------|-----|-----|----|
|         | PB2              | PB1 | PA | HA | PB2                       | PB1 | PA  | HA |
| PB1     | 0                |     |    |    | 0                         |     |     |    |
| PA      | 288              | 20  |    |    | 299                       | 8   |     |    |
| HA      | 0                | 320 | 0  |    | 0                         | 0   | 0   |    |
| NP      | 91               | 0   | 42 | 1  | 174                       | 5   | 357 | 1  |

632 Note: The number in each cell indicates the number of bootstrap replicates satisfying  $\hat{\theta}^* - \hat{\theta} > \hat{\theta}$ ,  
633 where  $\hat{\theta}$  is the estimated value of difference of divergence rate between two segments and  $\hat{\theta}^*$  is the  
634 value of  $\hat{\theta}$  computed from each bootstrap sample. Bootstrap resampled for 1000 times.

635

636 Figure 1

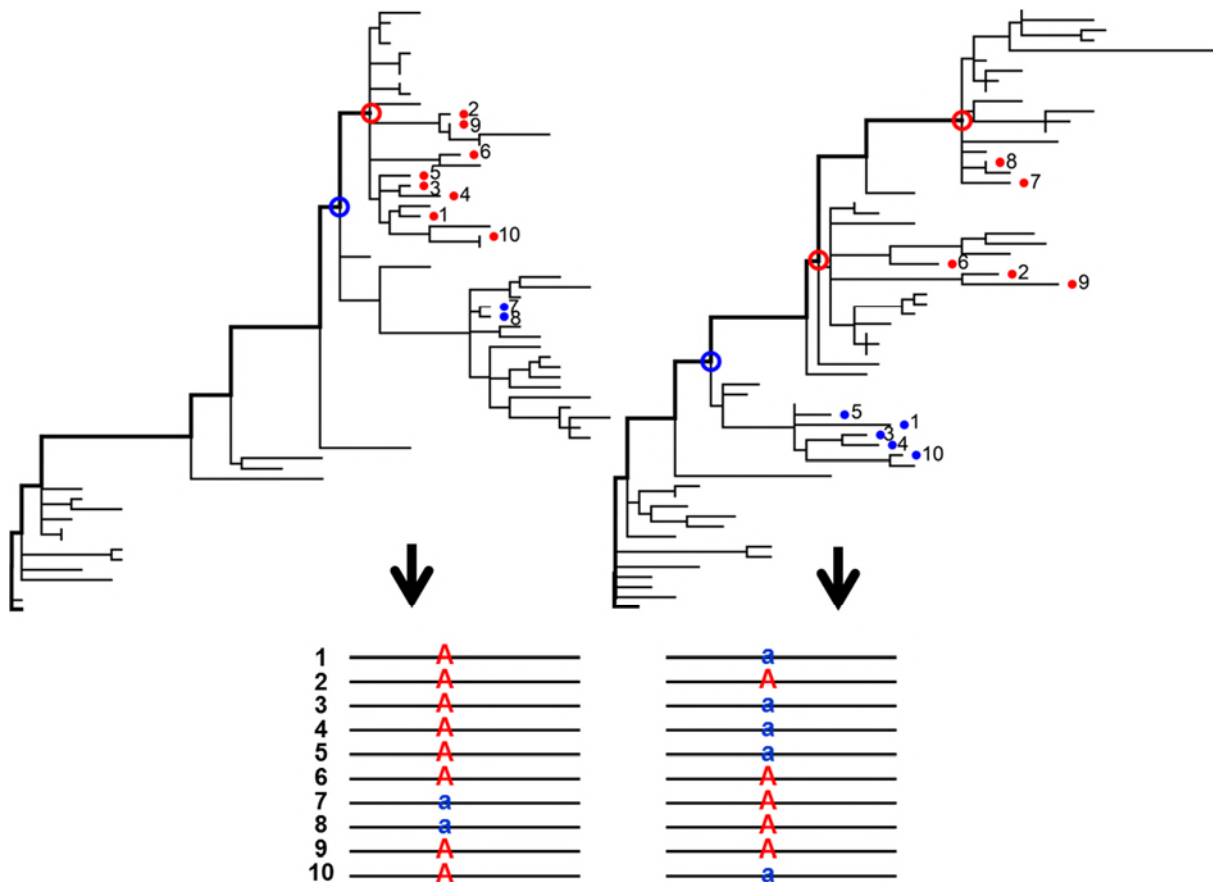

637

638

639 Figure legend: Topology-based linkage disequilibrium (TBLD) method. (A) Phylogenies are  
640 constructed from two segments. From a phylogeny of a segment, each taxon within a 6-month time  
641 window (numbered from 1 to 10) is traced back to the tree trunk (thicker line) and is mapped to the  
642 "first node" encountering the tree trunk on its way (empty circles). Then we grouped taxa into two  
643 according to their "first nodes": the first group (blue filled circles) consists of taxa mapped to the most  
644 ancestral first node (blue empty circle) and the second group (red filled circles) consists of taxa mapped  
645 to the other first nodes (red empty circles). (B) Taxa are labeled according to their group so that  $r^2$  is  
646 calculated to quantify TBLD.

647

648 Figure 2

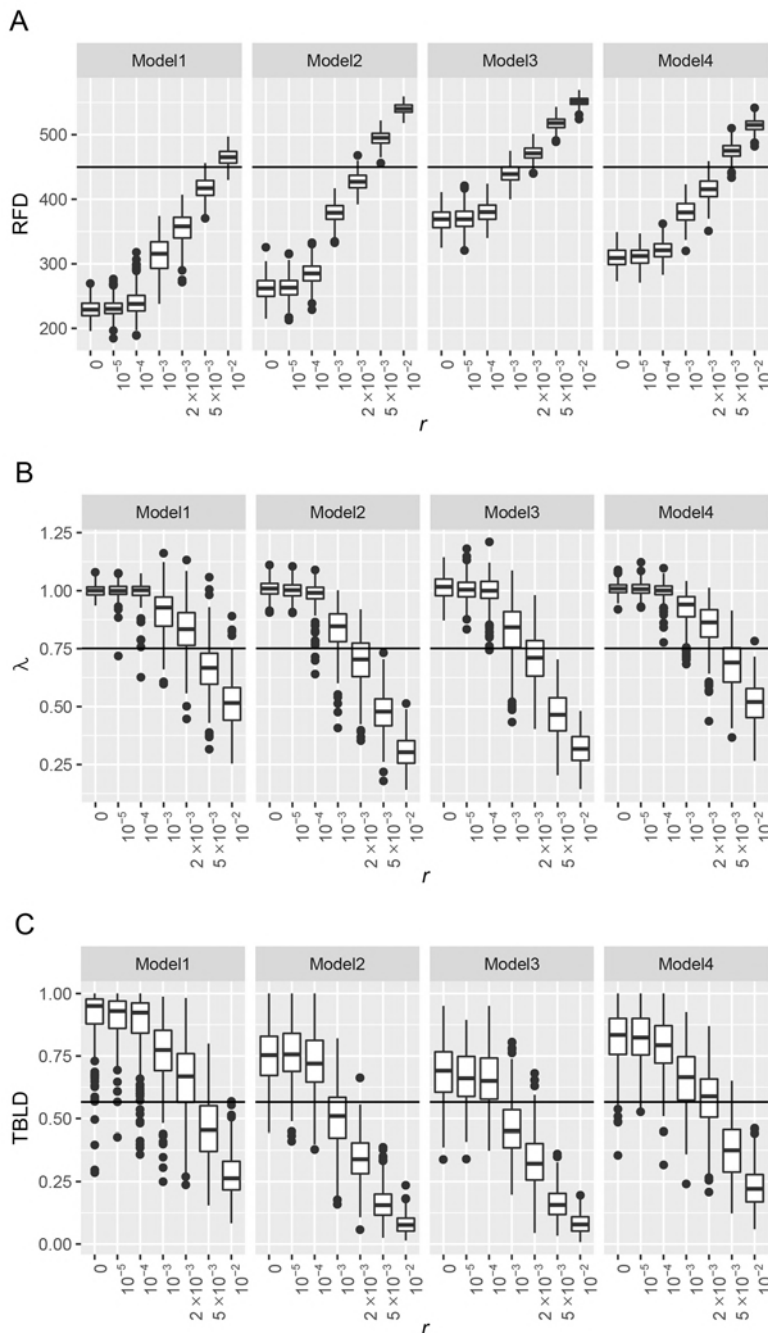

649

650 Figure legend: Summary statistics of tree incongruity or linkage disequilibrium with varying  
651 reassortment rate ( $r$ ) of H3N2 in simulations. Boxplot of estimates of (A) Robinson-Foulds metric, (B)  
652 ratio of between-segment  $r^2$  to within-segment  $r^2$  ( $\lambda$ ) and (C) topology-based LD. Each simulation of  
653 evolutionary scenario and reassortment rate is run for 300 replicates. A solid line in each plot indicates  
654 the average of estimates from HA-PB2, HA-PB1, HA-PA and HA-NP.

655

656 Figure 3

657 A.

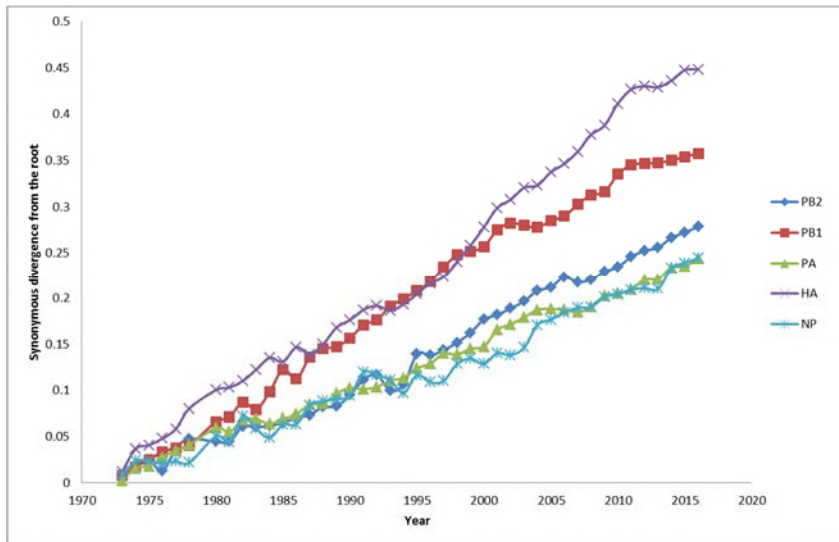

658

659 B.

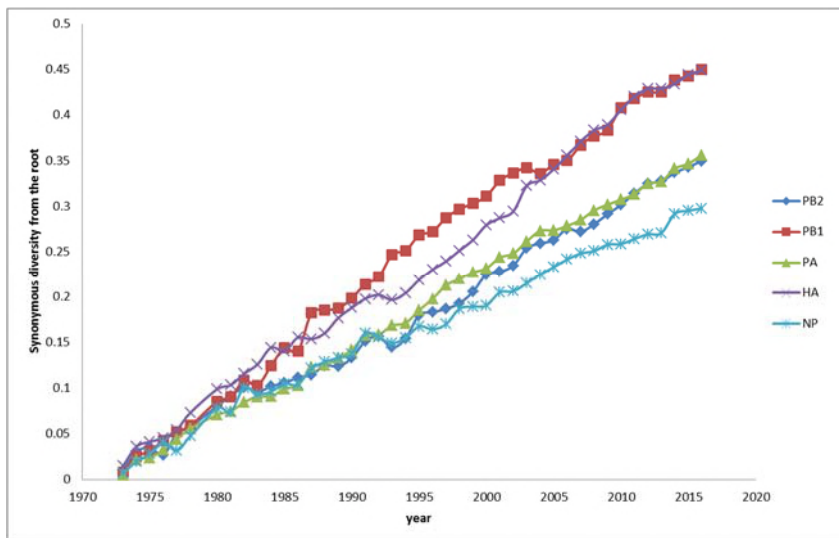

660

661 Figure legend: Divergence of H3N2 segments from 1973. Nucleotide divergence from 1973 to each  
662 year is calculated from (A) four-fold synonymous sites and (B) synonymous sites according to Neigh-  
663 Gojobori method.

664



665 Figure 4

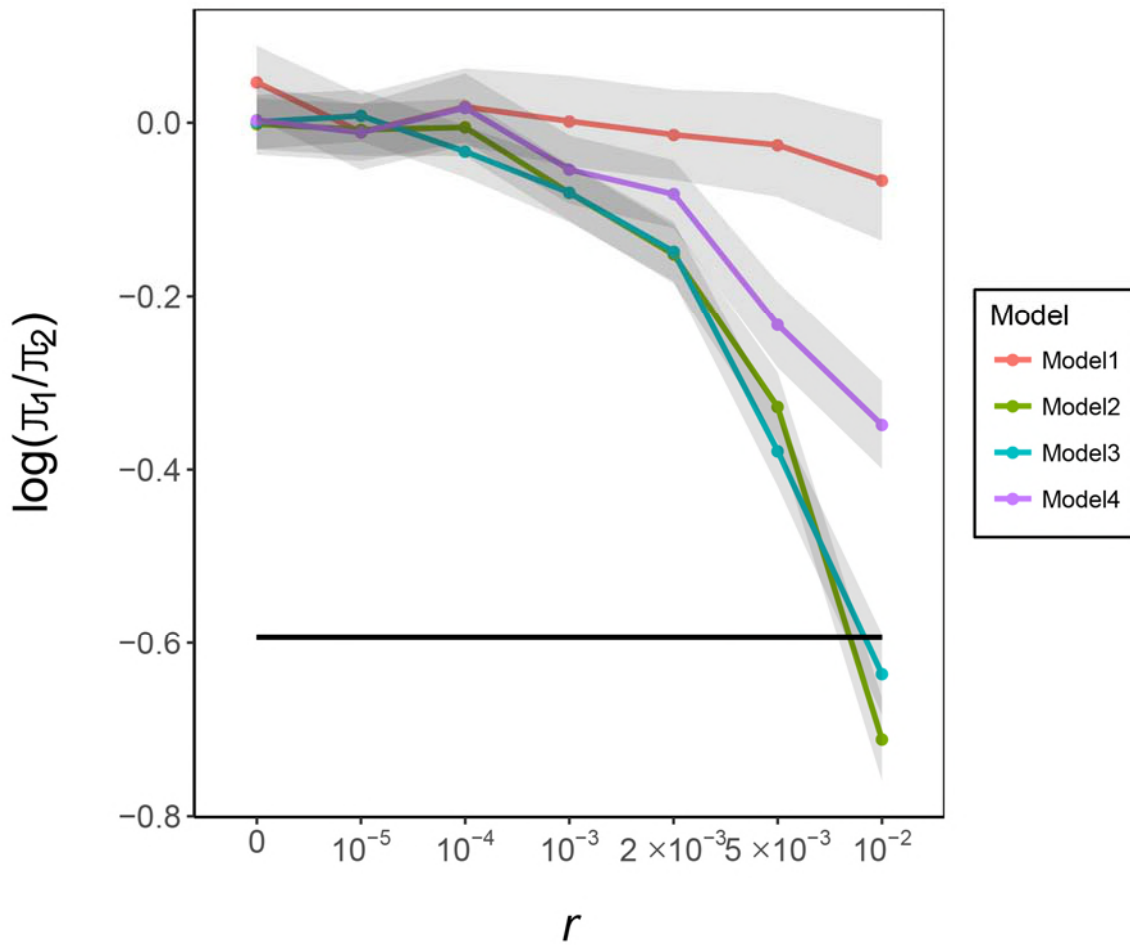

666

667 Figure legend: Synonymous diversity of segment 1 relative to segment 2 ( $\pi_1/\pi_2$ ) in simulations under  
668 different rates of reassortment. The simulated segment 1 mimics HA segment, which is under recurrent  
669 positive selection, and the simulated segment 2 mimics a non-antigenic segment (PB2, PB1, PA or NP)  
670 of H3N2. Evolutionary models with selection (models 2, 3, and 4) uses  $s = 0.1$ . A solid horizontal line  
671 indicates the observed ratio of  $\pi^*$  at HA to mean  $\pi^*$  at non-antigenic segments. Gray shades indicate  
672 confidential interval given by mean  $\pm 2$  standard errors. Note that parameters of each model were  
673 adjusted to yield nearly constant  $\pi_1$  over values of  $r$ . Therefore, it is  $\pi_2$  that increases with increasing  $r$ .

674

675 Figure 5

676

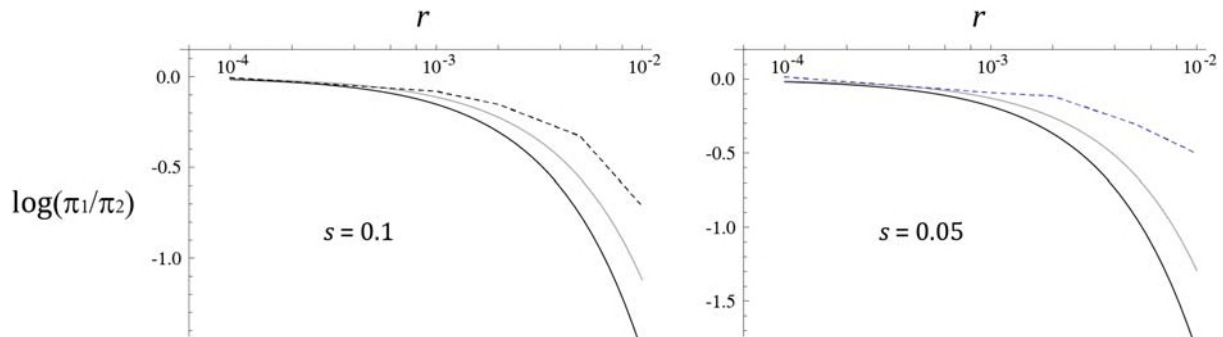

677

678 Figure legend: Synonymous diversity of segment 1 relative to segment 2 ( $\pi_1/\pi_2$ ) in simulations under  
679 different rates of reassortment ( $r$ ) predicted by eq. (5) using  $f = 2s$  (dark curve) or using the observed  
680 fixation probability (0.0269 for  $s = 0.1$  and 0.0253 for  $s = 0.05$ ) for  $f$ . Simulation results for model 2 are  
681 shown by points connected by dashed lines.

682

683

SUPPORTING INFORMATION for

684

K. Kim, Y. Park, and Y. Kim, Reassortment, positive selection, and the inter-segmental patterns of

685

divergence and polymorphism in influenza virus H3N2, submitted to GENETICS

686

687

688 Table S1. Average Tajima's D in simulations

| <i>r</i>           | Model 1 |        | Model 2 |        | Model 3 |        | Model 4 |        |
|--------------------|---------|--------|---------|--------|---------|--------|---------|--------|
|                    | Seg. 1  | Seg. 2 | Seg. 1  | Seg. 2 | Seg. 1  | Seg. 2 | Seg. 1  | Seg. 2 |
| 0                  | -0.29   | -0.28  | -2.10   | -2.11  | -2.17   | -2.20  | -1.57   | -1.60  |
| $10^{-5}$          | -0.31   | -0.31  | -2.09   | -2.10  | -2.18   | -2.20  | -1.56   | -1.58  |
| $10^{-4}$          | -0.27   | -0.27  | -2.08   | -2.10  | -2.16   | -2.18  | -1.58   | -1.60  |
| $10^{-3}$          | -0.30   | -0.30  | -2.09   | -2.06  | -2.16   | -2.14  | -1.57   | -1.57  |
| $2 \times 10^{-3}$ | -0.28   | -0.27  | -2.08   | -1.99  | -2.17   | -2.11  | -1.58   | -1.53  |
| $5 \times 10^{-3}$ | -0.30   | -0.27  | -2.08   | -1.83  | -2.16   | -1.91  | -1.56   | -1.39  |
| $10^{-2}$          | -0.27   | -0.30  | -2.08   | -1.49  | -2.14   | -1.65  | -1.57   | -1.24  |

689

690

691 Figure S1.

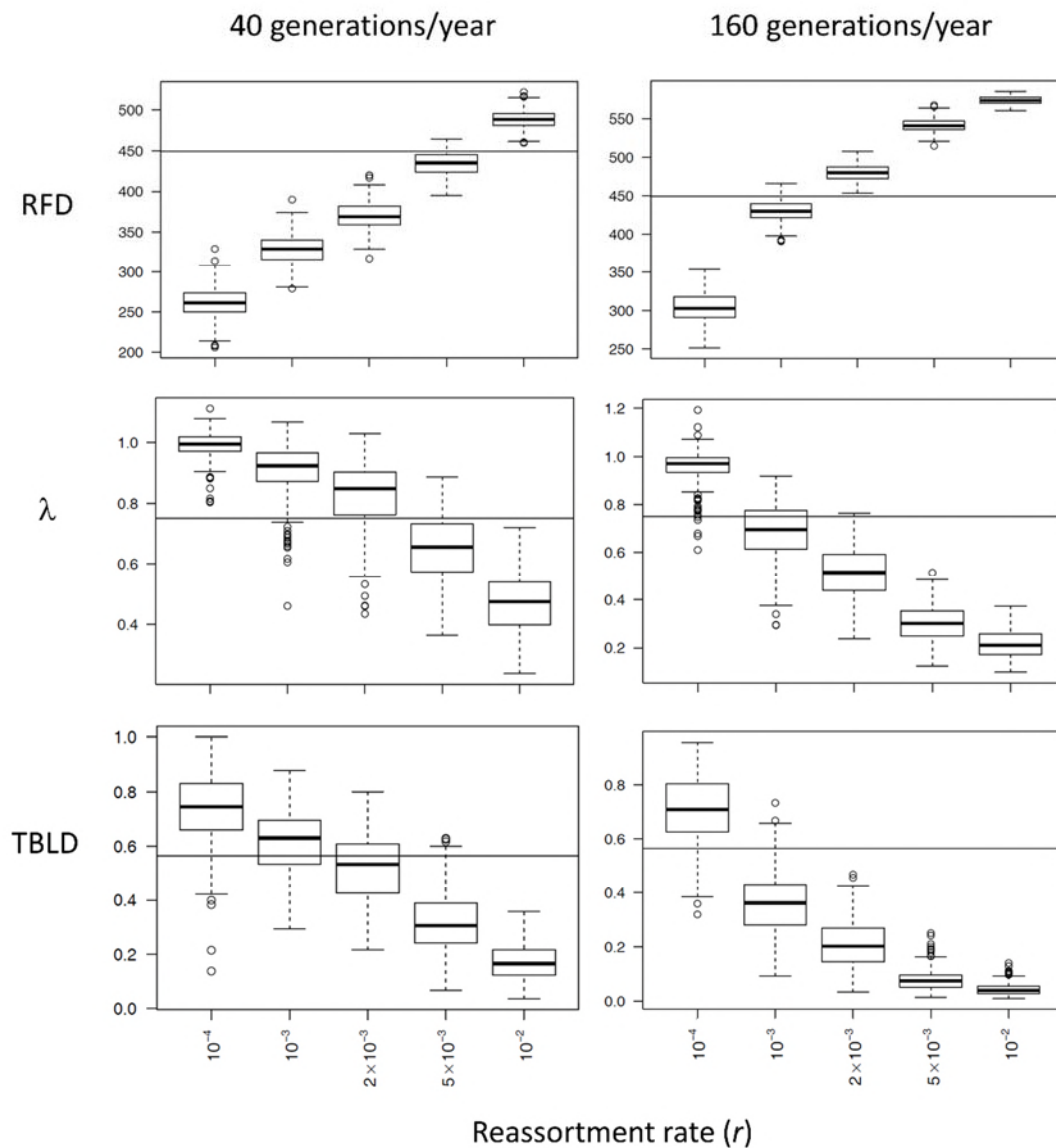

692

693 Figure S1 legend: Correlation/incongruence statistics in simulations of model 2 with varying  
 694 reassortment rate when the number of generations is 40 or 160 per year. Four-fold increase in  
 695 generations/year led to reduction in the estimates of  $r$  (per generation) by approximately the same factor,  
 696 yielding approximately constant reassortment rate per year. Note that, relative to simulation with 80  
 697 generations per year, population size decreases (increases) and mutation rate/generation increases  
 698 (decreases) by a factor of  $\sim 2$  in the simulation with 40 (160) generations/year to produce the equivalent  
 699 level of synonymous polymorphism.

700 Figure S2

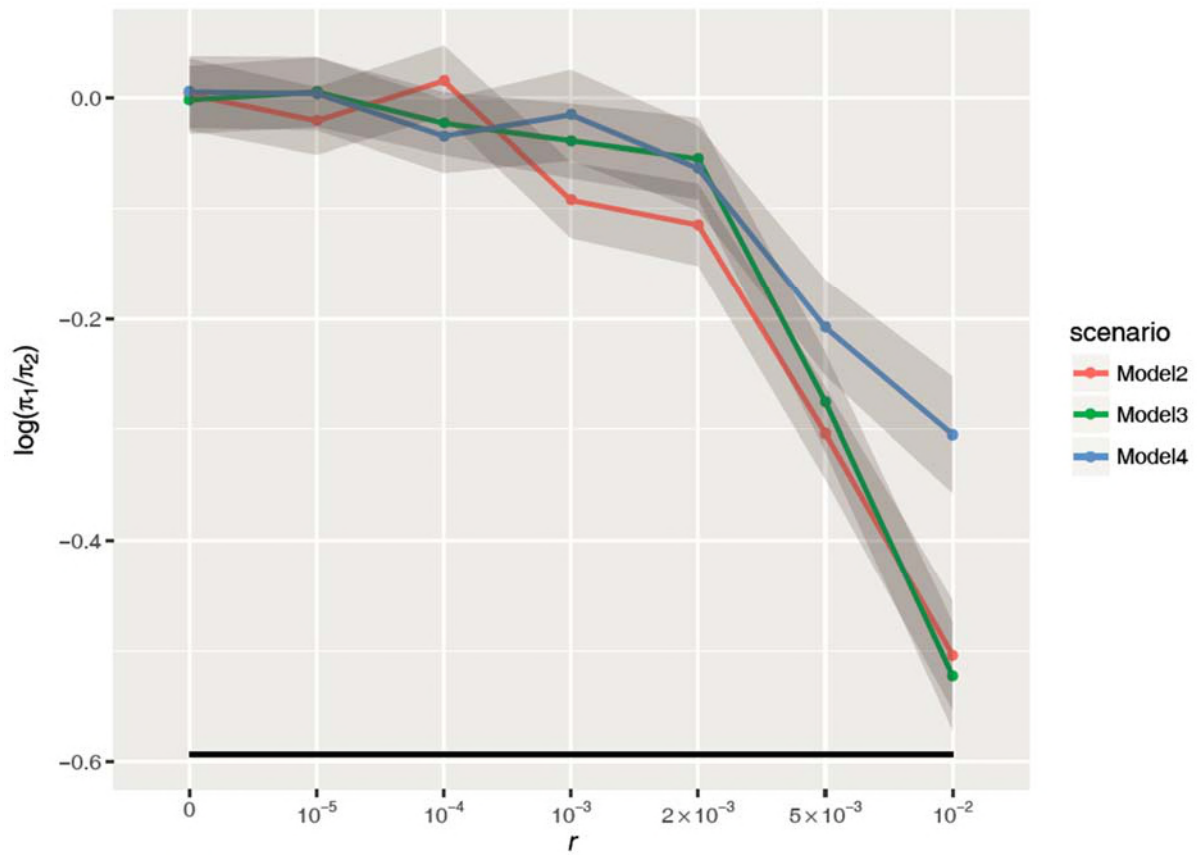

701

702

703 Figure S2 legend: Synonymous diversity of segment 1 relative to segment 2 ( $\pi_1/\pi_2$ ) in simulations under  
704 different rates of reassortment with  $s = 0.05$ . A solid horizontal line indicates the observed ratio of  $\pi^*$   
705 at HA to mean  $\pi^*$  at non-antigenic segments. Gray shades indicate confidential interval given by mean  
706  $\pm 2$  standard errors.

707

708 Figure S3.

709

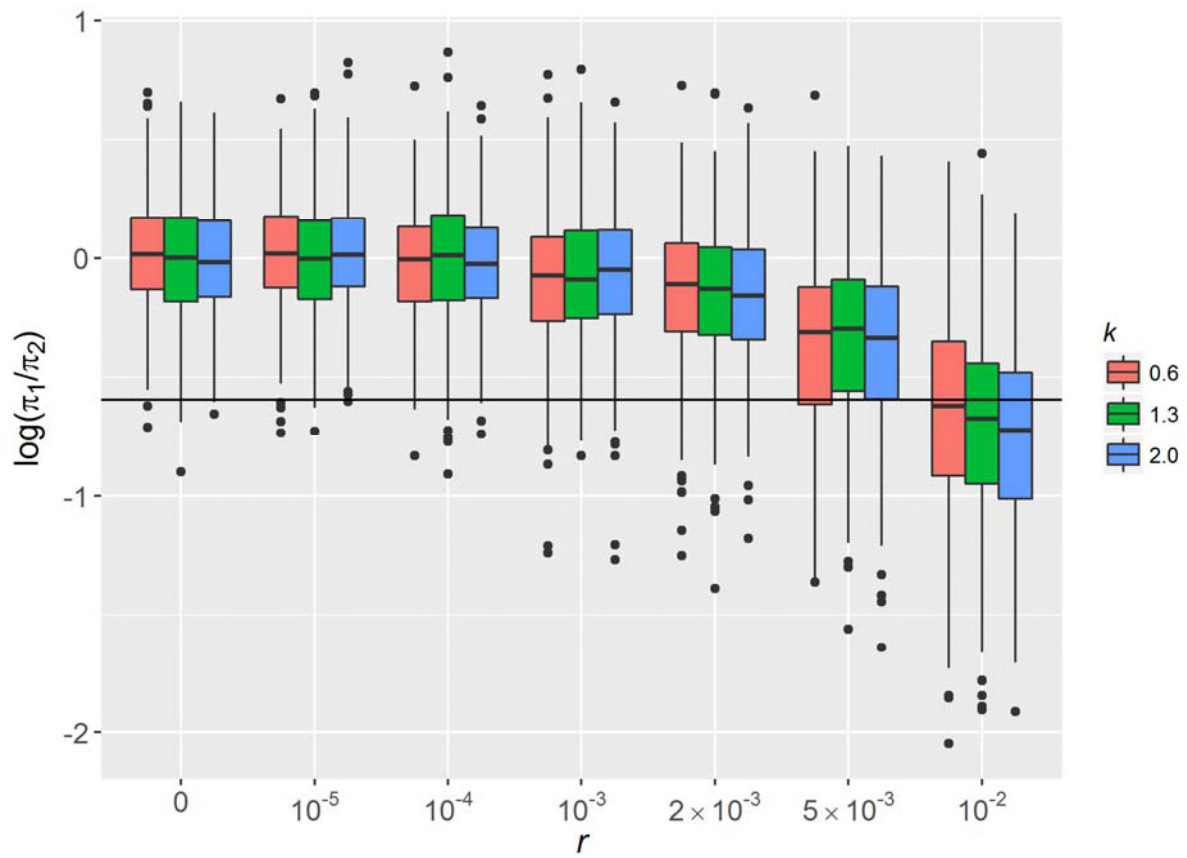

710

711

712 Figure S3 legend: Synonymous diversity of segment 1 relative to segment 2 ( $\pi_1/\pi_2$ ) in simulations with  
713 different reassortment rates ( $r$ ) and adaptive substitution rates ( $k$ ). Results of model 2 only are shown.

714

715
